# Supplementary material
Source: Springer Nature journal article supplement (https://www.springerprofessional.de/resource/supplementary/13638_2011_314_MOESM14_ESM.pdf/11897560)

N° Hops

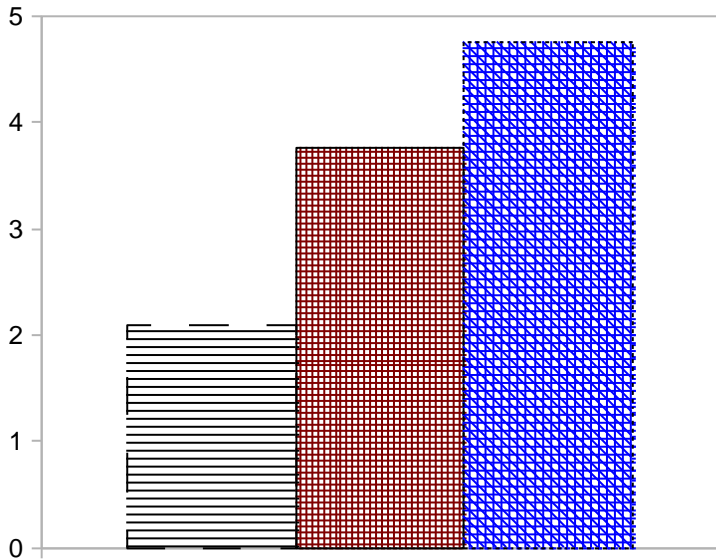

- SCENARIO A
- SCENARIO B
- SCENARIO C

Supplement: MOESM14 [file 11897560]
